# Supplementary material for: Bone-on-leaf-chip for the study of lung cancer bone metastasis
Source: Royal Society of Chemistry journal article supplement (doi:10.1039/d5lc00951k), 2026-01-01
Supplement: d5lc00951k2.pdf [file d5lc00951k2.pdf]

Supplementary Information

**Bone-on-leaf-chip for the study of lung cancer bone metastasis**

Qi Liu<sup>ab</sup>, Di Suo<sup>ab</sup>, Renxian Wang<sup>e</sup>, Shuai Zhao<sup>ab</sup>, Mao Mao<sup>c</sup>, Wei-Ning Lee<sup>e</sup>, Yuhe Yang<sup>\*ab</sup> and Xin Zhao<sup>\*abd</sup>

<sup>a</sup>. Department of Applied Biology and Chemical Technology, the Hong Kong Polytechnic University, Hung Hom, Kowloon, Hong Kong SAR, China.

<sup>b</sup>. The Hong Kong Polytechnic University Shenzhen Research Institute, Shenzhen, China.

<sup>c</sup>. State Key Laboratory for Manufacturing Systems Engineering, Xi'an Jiaotong University, Xi'an, China.

<sup>d</sup>. Research Institute for Intelligent Wearable Systems, the Hong Kong Polytechnic University, Hung Hom, Kowloon, Hong Kong SAR, China.

<sup>e</sup>. Department of Electrical and Electronic Engineering, The University of Hong Kong, Hong Kong SAR, China.

\* Corresponding author.

*E-mail address:* yuhe.yang@polyu.edu.hk (Y. Yang), xin.zhao@polyu.edu.hk (X. Zhao).

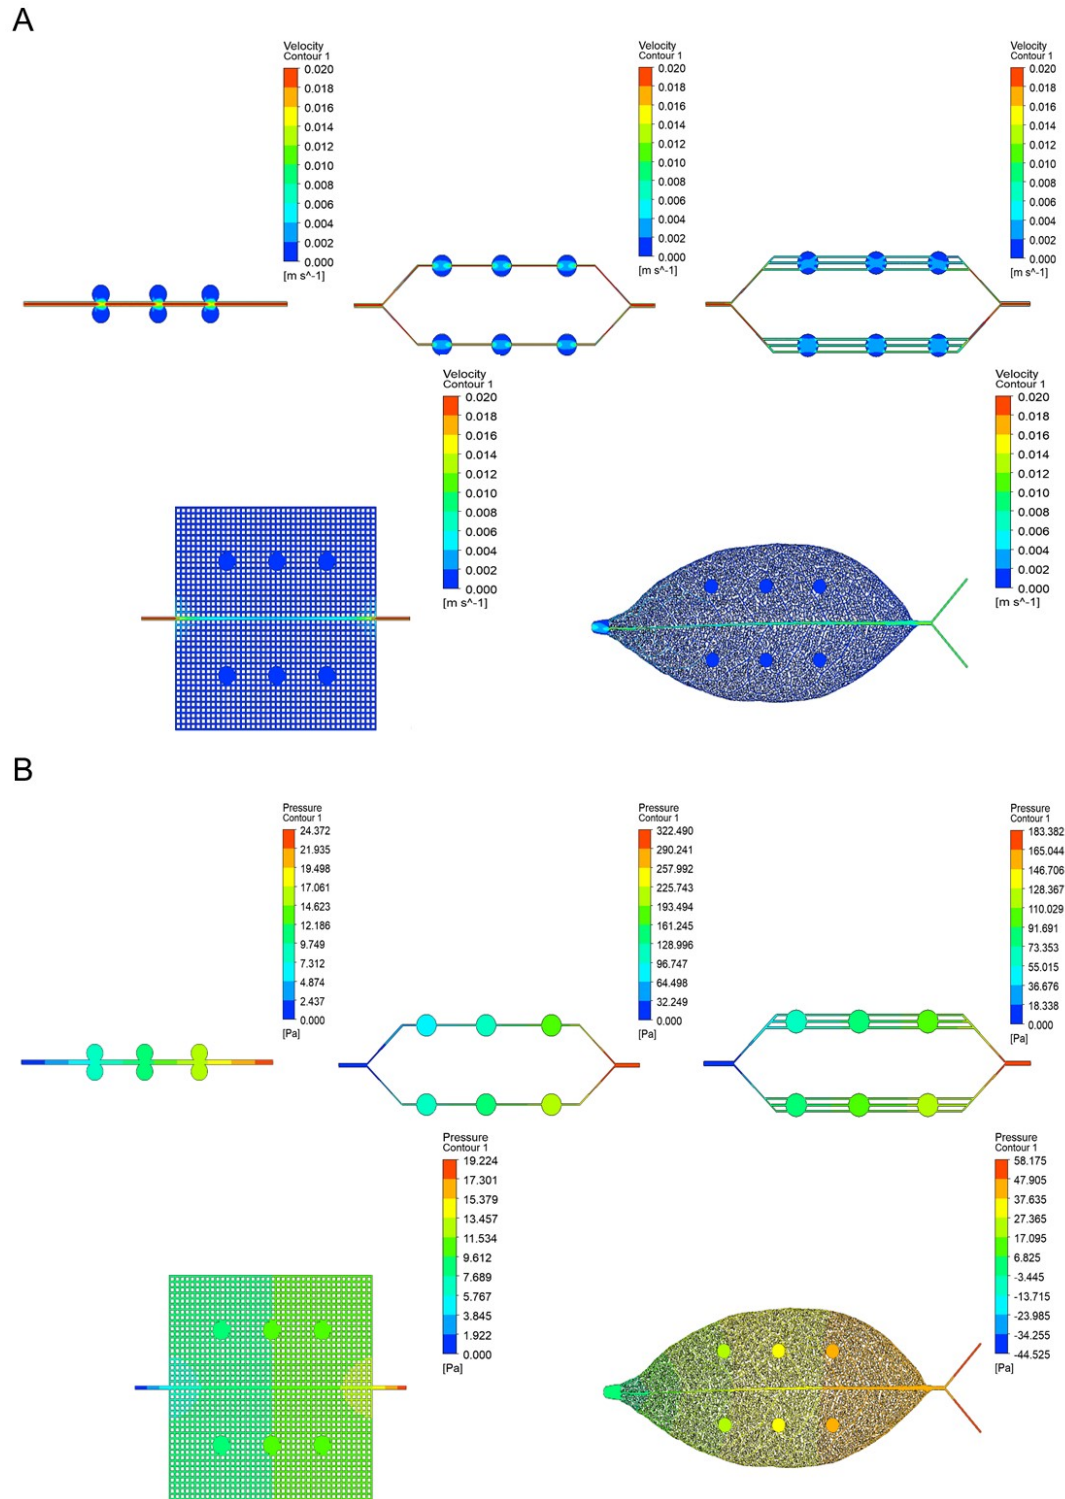

**Fig. S1** A) Velocity distribution and B) pressure distribution of the leaf vein chip and other microfluidic chips with chambers and different degrees of branching.

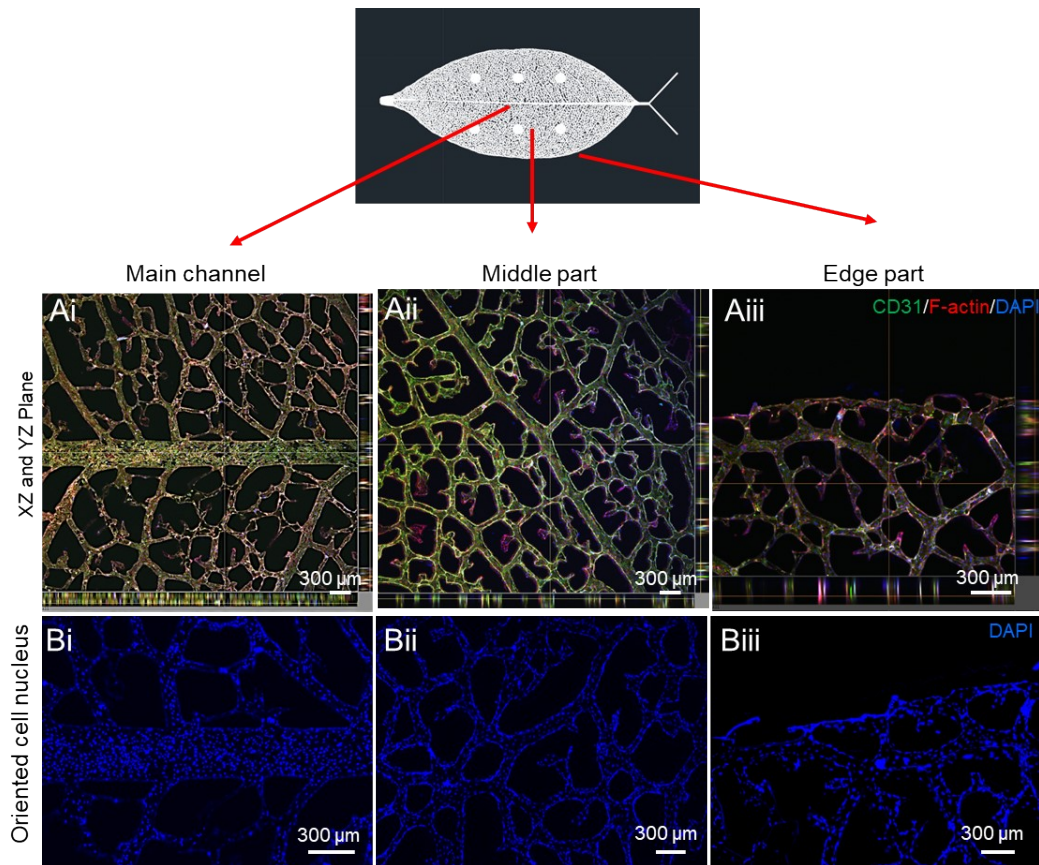

**Fig. S2** A) The cross-sectional view of CD31/F-actin/DAPI staining of the (i) main channel, (ii) middle part and (iii) edge part. B) Oriented cell nucleus along the (i) main channel, (ii) middle part and (iii) edge part.

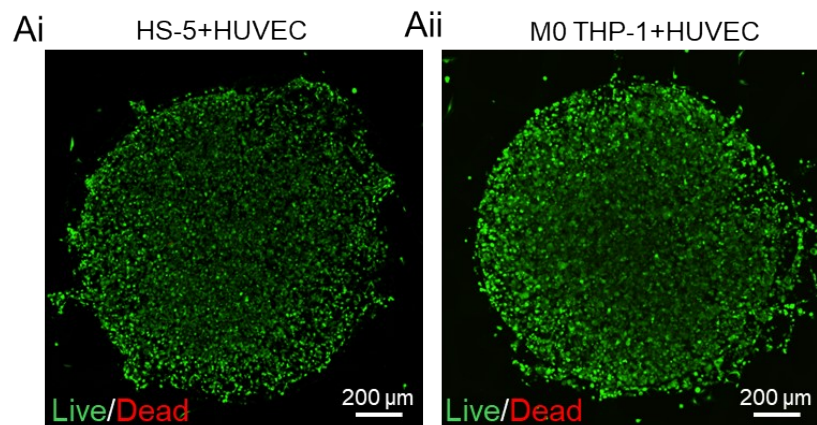

**Fig. S3** A) Live/dead staining of (i) HS-5 and HUVEC cell-loaded hydrogel and (ii) M0 THP-1 and HUVEC cell-loaded hydrogel.

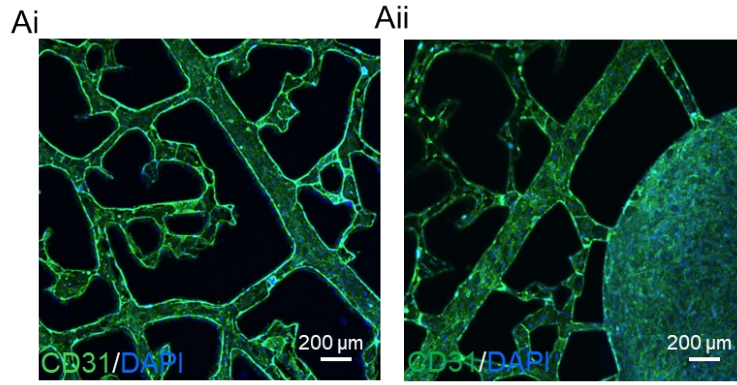

**Fig. S4** A) Immunofluorescence images of vascular network in channels (i) and between the chamber and channels (ii) stained with CD31 (green) and DAPI (blue).

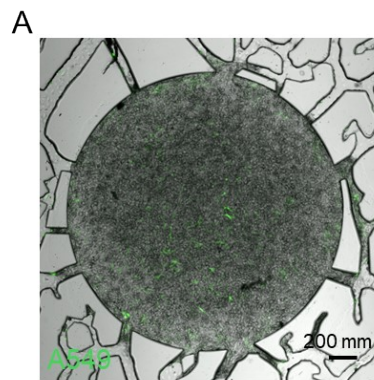

**Fig. S5** A) Representative image of A549 cells perfused into the vascular network within the chamber.

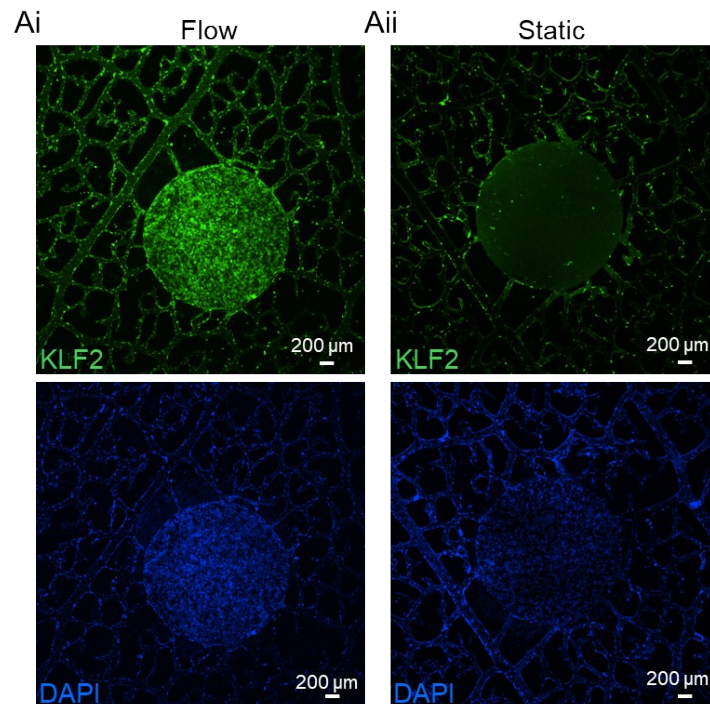

**Fig. S6** A) Immunofluorescence images of the leaf vein chip cultured under flow (i) and static (ii) conditions stained with shear-responsive marker KLF2 (green) and DAPI (blue).



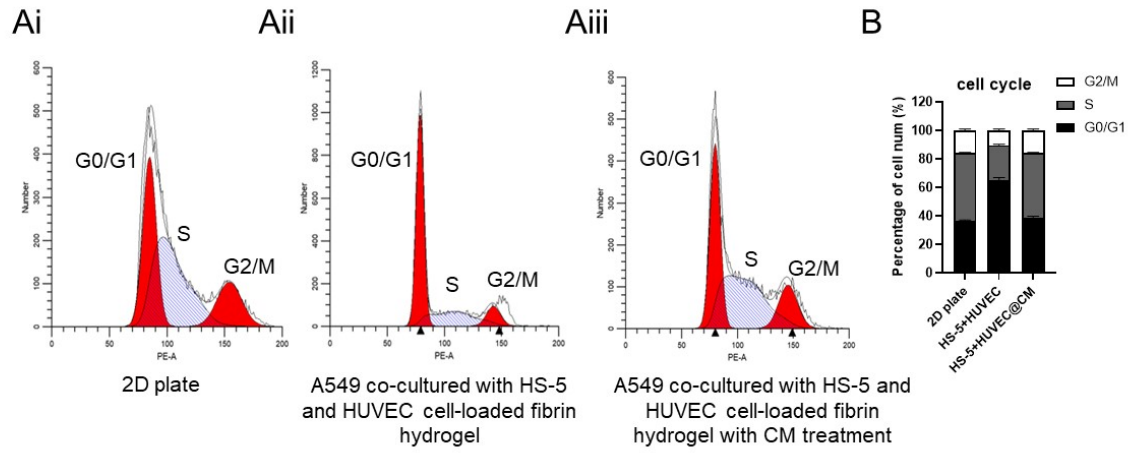

**Fig. S7** A) Off-chip cell cycle experiment of (i) A549 cultured in 2D plate, (ii) A549 co-cultured with HS-5 and HUVEC cell-loaded fibrin hydrogel in the transwell system and (iii) A549 co-cultured with HS-5 and HUVEC cell-loaded fibrin hydrogel with tumor conditioned medium (CM) treatment in the transwell system. B) Quantitative cell cycle analysis of tumor cells in three different groups.

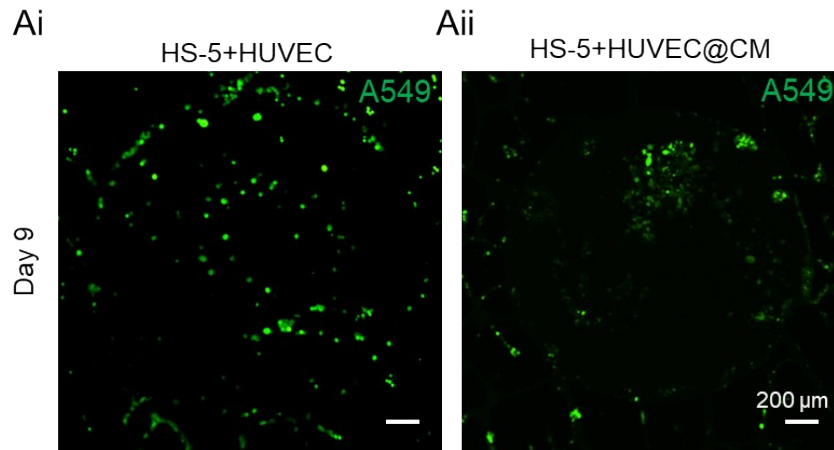

**Fig. S8** A) Cell morphology for A549 in vascularized bone environment consisting of HS-5 and HUVEC cells perfused with (i) normal medium (ECM:DMEM=1:1) and (ii) experimental medium (ECM:CM=1:1) on day 9.

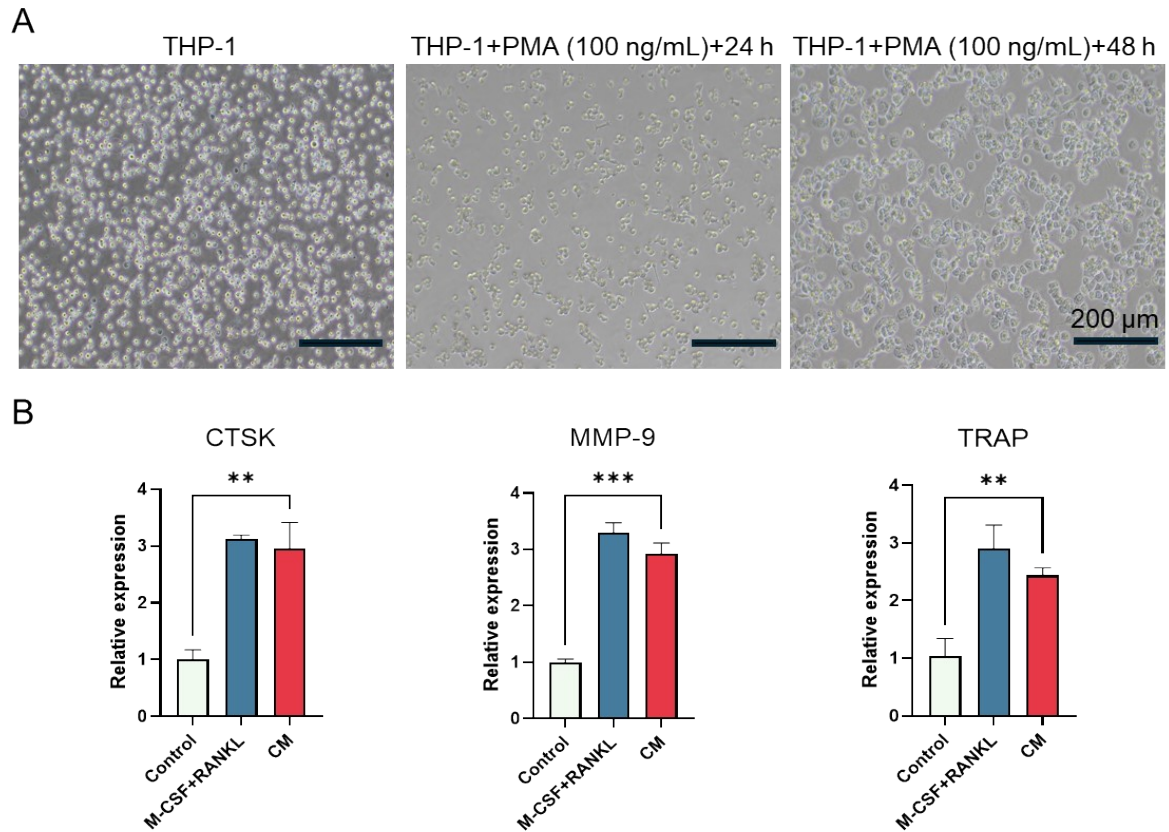

**Fig. S9** A) Cell morphology of THP-1 and M0 THP-1 induced by PMA. B) RT-qPCR results of osteoclast gene (CTSK, MMP-9 and TRAP) expression of M0 THP-1 cells induced by M-CSF and RANKL or CM for 5 days. The differences are statistically significant when p values are below 0.05 (\*), 0.01 (\*\*), and 0.001 (\*\*\*).

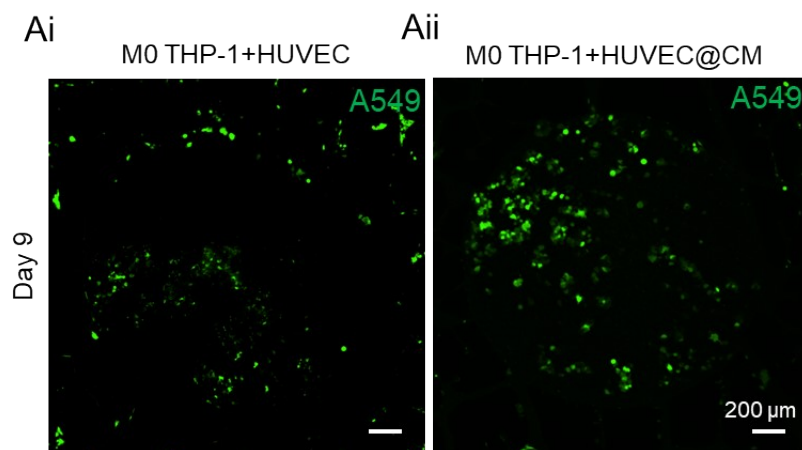

**Fig. S10** A) Cell morphology for A549 in vascularized bone environment consisting of M0 THP-1 and HUVEC cells perfused with (i) normal medium (ECM:DMEM=1:1) and (ii) experimental medium (ECM:CM=1:1) on day 9.

**Table S1.** Average velocity and coefficient of variation (CV) of velocity distribution in the chamber of microfluidic chips from PIV results and pressure drop of microfluidic chips from 2D simulation models.

|                         | No branch | Single branch | Three branches | Grid   | Leaf vein |
|-------------------------|-----------|---------------|----------------|--------|-----------|
| Average velocity (mm/s) | 0.29      | 0.33          | 0.25           | 0.04   | 0.08      |
| Velocity CV (%)         | 41.30%    | 30.39%        | 21.06%         | 29.91% | 27.38%    |
| Pressure drop (Pa)      | 23.96     | 322.13        | 183.03         | 18.87  | 116.02    |

**Table S2.** Primer sequences in the RT-qPCR.

| Genes          | Sequences                                                             |
|----------------|-----------------------------------------------------------------------|
| CTSK           | F:5'- AAATCAGGGTCAGTGTGGTTCC-3'<br>R:5'-TCATTCTCAGACACACAATCCACTA -3' |
| MMP-9          | F:5'-GCACGACGTCTTCCAGTACC -3'<br>R:5'- GGTTCAACTCACTCCGGGAA-3'        |
| TRAP           | F:5'-AAGATGAGAATGGCGTGGGCTA-3'<br>R:5'-ACCCAGTGAGTCTTCAGTCCCAT-3'     |
| BMP-1          | F:5'- GCCACGTTTCCATCGTTCG-3'<br>R:5'-AGAATGTGTTCCGAGCGTAATG-3'        |
| Wnt-5a         | F:5'- GCCAGTATCAATTCCGACATCG-3'<br>R:5'-TCACCGCGTATGTGAAGGC-3'        |
| MIP-3 $\alpha$ | F:5'-GGGTACTCAAACTGAGCAGA-3'<br>R:5'-AGTCAAAGTTGCTTGCTTCTGA-3'        |
| TGF- $\beta$ 2 | F:5'-CCATCCCGCCCACTTTCTAC-3'<br>R:5'-AGCTCAATCCGTTGTTTCAGGC-3'        |
| VCAM-1         | F:5'-GGGAAGATGGTCGTGATCCTT-3'<br>R:5'-TCTGGGGTGGTCTCGATTTTA-3'        |
| CCL5           | F:5'-CCAGCAGTCGTCTTTGTCAC-3'<br>R:5'-CTCTGGGTTGGCACACACTT-3'          |
